# Supplementary material for: Iron(iii) chelated paramagnetic polymeric nanoparticle formulation as a next-generationT1-weighted MRI contrast agent
Source: Royal Society of Chemistry journal article supplement (doi:10.1039/d1ra05544e), 2021-01-01
Supplement: d1ra05544e1.pdf [file d1ra05544e1.pdf]

## Supporting Information

### **Iron (III) chelated paramagnetic polymeric nanoparticle as next-generation T<sub>1</sub>-weighted MRI contrast agent**

*Ramesh Marasini<sup>1,2</sup>, Sagar Rayamajhi<sup>1,2</sup>, Anthony Moreno-Sanchez<sup>1,2</sup>, Santosh Aryal<sup>3\*</sup>*

1. Department of Chemistry

College of Arts and Sciences

Kansas State University, Manhattan, KS 66506

2. Nanotechnology Innovation Center of Kansas State (NICKS)

Department of Anatomy and Physiology

College of Veterinary Medicine

Kansas State University, Manhattan, KS 66506

3. Department of Pharmaceutical Sciences and Health Outcomes

The Ben and Maytee Fisch College of Pharmacy

The University of Texas, Tyler, TX 75799

\*Corresponding Author: [santosharyal@uttyler.edu](mailto:santosharyal@uttyler.edu)

| Order | Reagent                                             | Amount (g/L) | Sample |
|-------|-----------------------------------------------------|--------------|--------|
| 1     | NaCl                                                | 6.547        | A      |
| 2     | NaHCO <sub>3</sub>                                  | 2.268        | B      |
| 3     | KCl                                                 | 0.373        | C      |
| 4     | Na <sub>2</sub> HPO <sub>4</sub> ·2H <sub>2</sub> O | 0.178        | D      |
| 5     | MgCl <sub>2</sub> ·2H <sub>2</sub> O                | 0.305        | E      |
| 6     | CaCl <sub>2</sub> ·2H <sub>2</sub> O                | 0.368        | F      |
| 7     | Na <sub>2</sub> SO <sub>4</sub>                     | 0.071        |        |
| 8     | (CH <sub>2</sub> OH) <sub>3</sub> CNH <sub>2</sub>  | 6.057        |        |

**Table 1** Composition of simulated body fluid in order of mixing reagents. Samples A–C is prepared under ambient conditions while samples D–F at 37 °C while stirring.

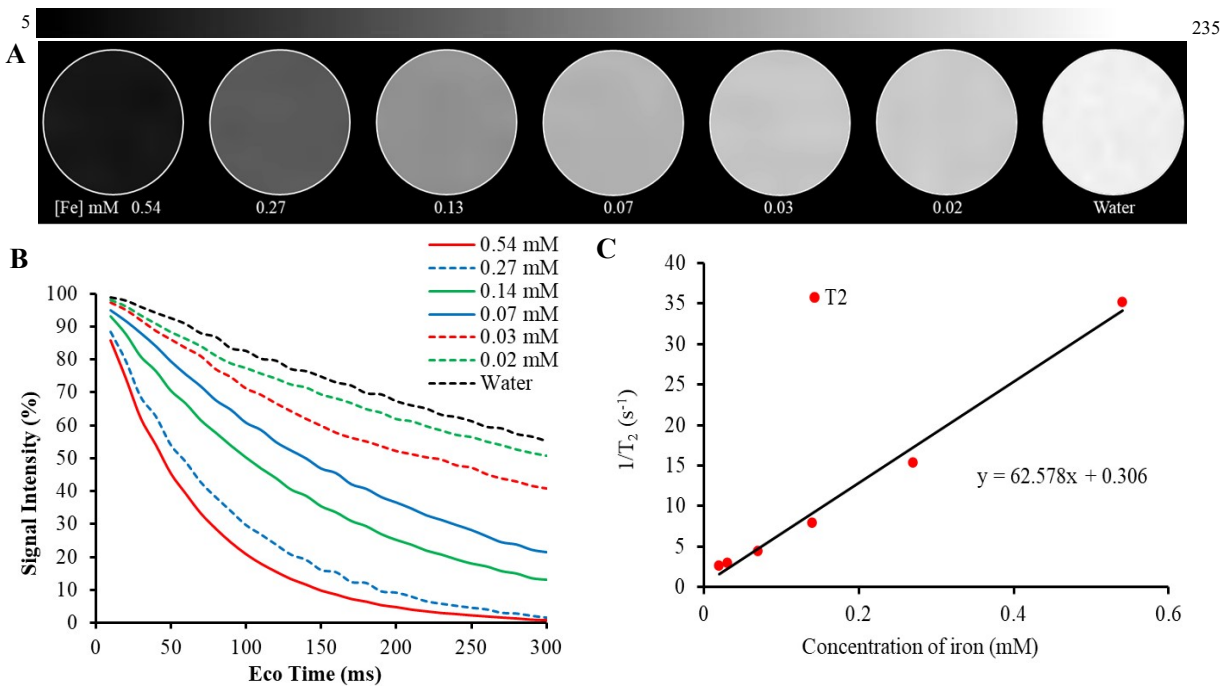

**Figure S1** Relaxivity study of iron (III) chelated polymeric NPs in the ultra-high magnetic field. A)  $T_2$ -weighted MR phantom images of iron (III) chelated PLGA NPs aqueous suspensions with different concentrations acquired using TR/TE= 1500/16 ms corresponding to recovery curve B) at ultra-high-field (14.1 T) as a function of iron concentration. The corresponding signal intensity of the phantoms was obtained by drawing the region of interest (ROI) using paravision software. C)  $T_2$  transverse relaxation rate against  $Fe^{3+}$  concentration measured at 14.1 T MRI system at room temperature.

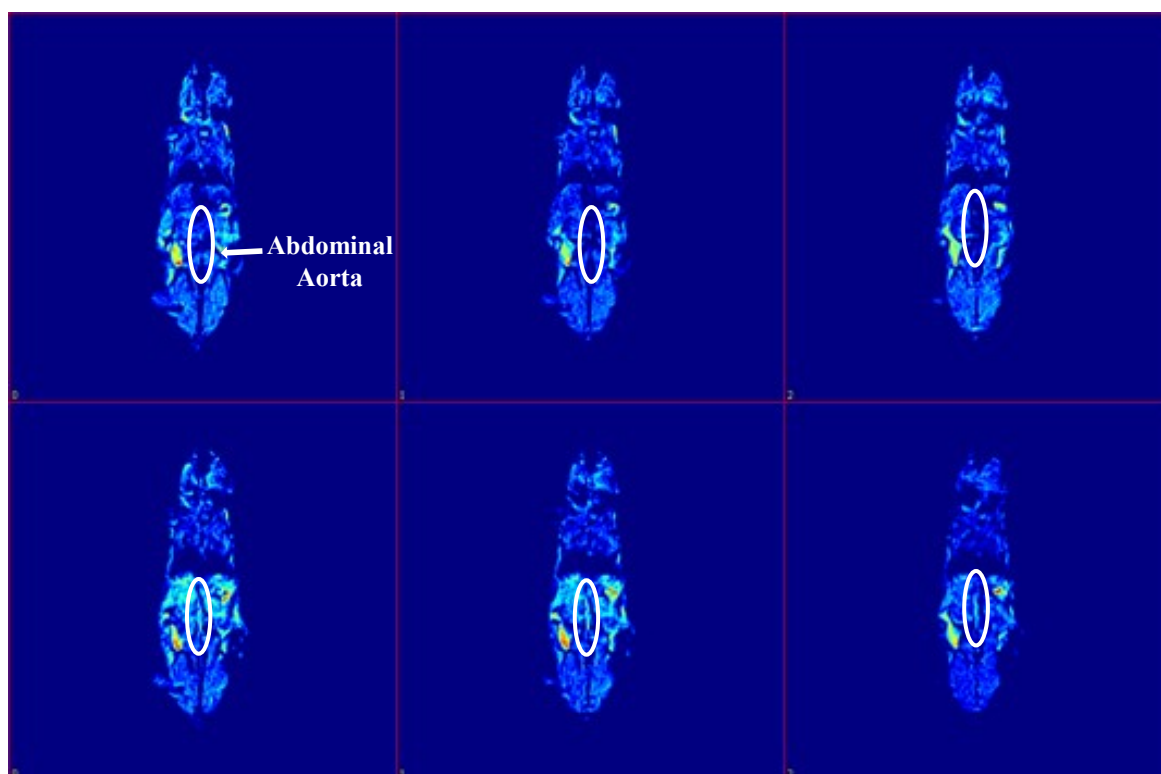

**Figure S2.** Coronal slices (1, 2, 3 from left to right) of pre-injection (upper panel) and at-injection (lower panel) of Fe-PLGA NPs showing the contrast enhancement of in abdominal aorta in mice during dynamic imaging at 3 T.
